# Supplementary material
Source: PubMed Central journal article supplement (PMC8324466)
Supplement: mmc1.pdf [file mmc1.pdf]

**Cell Reports Medicine, Volume 2**

**Supplemental information**

**Serological analysis reveals  
an imbalanced IgG subclass composition  
associated with COVID-19 disease severity**

**Jennifer L. Yates, Dylan J. Ehrbar, Danielle T. Hunt, Roxanne C. Girardin, Alan P. Dupuis II, Anne F. Payne, Mycroft Sowizral, Scott Varney, Karen E. Kulas, Valerie L. Demarest, Kelly M. Howard, Kyle Carson, Margaux Hales, Monir Ejemel, Qi Li, Yang Wang, Ruben Peredo-Wende, Ananthakrishnan Ramani, Gurpreet Singh, Klemen Strle, Nicholas J. Mantis, Kathleen A. McDonough, and William T. Lee**

1 **Supplemental Table 1: Ig Isotype Average Index Values and Clinical Positivity Rate for the**  
 2 **Convalescent Cohort (n=536), Related to Figure 2.**

|                                  | IgM  |      |      |      | IgA  |      |      |      | IgG  |       |       |       |
|----------------------------------|------|------|------|------|------|------|------|------|------|-------|-------|-------|
|                                  | NP   | RBD  | S1   | S2   | NP   | RBD  | S1   | S2   | NP   | RBD   | S1    | S2    |
| Average Index Value <sup>†</sup> | 1.35 | 6.45 | 9.75 | 0.50 | 1.51 | 3.86 | 6.06 | 3.14 | 8.49 | 12.43 | 19.68 | 23.21 |
| Positive <sup>‡</sup>            | 22%  | 73%  | 79%  | 5%   | 22%  | 60%  | 70%  | 34%  | 97%  | 97%   | 98%   | 98%   |
| Negative                         | 78%  | 27%  | 21%  | 95%  | 78%  | 40%  | 30%  | 66%  | 3%   | 3%    | 2%    | 2%    |

3 <sup>†</sup> Index value measurements were calculated by dividing the raw MFI by 3 standard deviation cut-off value  
 4 determined by a panel of 94 pre-pandemic normal human serum specimens.

5 <sup>‡</sup> Positivity is defined as 6 standard deviations above the mean MFI

6

7 **Supplemental Table 2: Ig Isotype Index Values Stratified for COVID-19 Disease Severity for the Convalescent Cohort**  
 8 **(n=481), Related to Figure 2.**

9

|            |                          | Mild  |        |        |        | Moderate     |               |             |              | Severe         |                |                |                |
|------------|--------------------------|-------|--------|--------|--------|--------------|---------------|-------------|--------------|----------------|----------------|----------------|----------------|
|            |                          | N     | RBD    | S1     | S2     | N            | RBD           | S1          | S2           | N              | RBD            | S1             | S2             |
| <b>IgM</b> | Mean                     | 0.995 | 5.544  | 7.853  | 0.468  | 1.574        | 7.273         | 11.490      | 0.522        | 1.574          | 7.168          | 11.120         | 0.621          |
|            | SD                       | 1.492 | 6.318  | 10.610 | 0.677  | 2.270        | 8.687         | 17.140      | 0.736        | 1.367          | 6.703          | 10.480         | 0.966          |
|            | SEM                      | 0.101 | 0.429  | 0.722  | 0.046  | 0.155        | 0.592         | 1.166       | 0.050        | 0.195          | 0.958          | 1.498          | 0.138          |
|            | Fold Change <sup>†</sup> |       |        |        |        | <b>1.6**</b> | <b>1.3</b>    | <b>1.5</b>  | <b>1.1</b>   | <b>1.6***</b>  | <b>1.3</b>     | <b>1.4**</b>   | <b>1.3</b>     |
| <b>IgA</b> | Mean                     | 1.268 | 3.348  | 4.981  | 2.903  | 1.374        | 3.661         | 6.077       | 3.399        | 3.072          | 5.982          | 10.030         | 3.072          |
|            | SD                       | 2.255 | 3.510  | 5.449  | 6.824  | 2.015        | 5.769         | 10.690      | 10.590       | 4.564          | 7.367          | 13.030         | 4.190          |
|            | SEM                      | 0.153 | 0.283  | 0.370  | 0.463  | 0.137        | 0.393         | 0.729       | 0.722        | 0.652          | 1.052          | 1.862          | 0.599          |
|            | Fold Change <sup>†</sup> |       |        |        |        | <b>1.1</b>   | <b>1.1</b>    | <b>1.2</b>  | <b>1.2</b>   | <b>2.4****</b> | <b>1.8</b>     | <b>2.0*</b>    | <b>1.1</b>     |
| <b>IgG</b> | Mean                     | 7.821 | 10.300 | 16.100 | 19.190 | 8.682        | 13.140        | 20.820      | 25.030       | 9.853          | 17.460         | 29.430         | 33.08          |
|            | SD                       | 3.276 | 6.955  | 11.930 | 21.630 | 3.171        | 7.740         | 13.370      | 25.220       | 2.677          | 8.665          | 17.330         | 30.95          |
|            | SEM                      | 0.222 | 0.472  | 0.810  | 1.468  | 0.216        | 0.528         | 0.912       | 1.720        | 0.382          | 1.238          | 2.475          | 4.422          |
|            | Fold Change <sup>†</sup> |       |        |        |        | <b>1.1</b>   | <b>1.3***</b> | <b>1.3*</b> | <b>1.3**</b> | <b>1.3***</b>  | <b>1.7****</b> | <b>1.8****</b> | <b>1.7****</b> |

10

11 †Fold change calculation based on the mean of the “mild” group

12 \*denotes significance where \*p<0.05 \*\*p<0.01 \*\*\*p<0.0001 \*\*\*\*p<0.0001 as determined by Kruskal-Wallis, adjusted for multiple  
 13 comparisons with Dunn’s test.

14 **Supplemental Table 3: IgG1-4 subclass Average Index Values and Clinical Positivity Rate for the**  
 15 **Convalescent Cohort (n=536), Related to Figure 3.**

|             |     | <b>Average Index Value<sup>†</sup></b> | <b>Clinical Positive<sup>‡</sup></b> | <b>Clinical Negative</b> |
|-------------|-----|----------------------------------------|--------------------------------------|--------------------------|
| <b>IgG1</b> | NP  | 19.03                                  | 97%                                  | 3%                       |
|             | RBD | 18.71                                  | 91%                                  | 9%                       |
|             | S1  | 137.97                                 | 97%                                  | 3%                       |
|             | S2  | 16.43                                  | 53%                                  | 47%                      |
| <b>IgG2</b> | NP  | 1.61                                   | 21%                                  | 10%                      |
|             | RBD | 1.09                                   | 10%                                  | 90%                      |
|             | S1  | 1.69                                   | 14%                                  | 86%                      |
|             | S2  | 3.20                                   | 8%                                   | 92%                      |
| <b>IgG3</b> | NP  | 4.93                                   | 64%                                  | 36%                      |
|             | RBD | 3.91                                   | 39%                                  | 61%                      |
|             | S1  | 6.18                                   | 59%                                  | 41%                      |
|             | S2  | 43.90                                  | 94%                                  | 6%                       |
| <b>IgG4</b> | NP  | 1.58                                   | 9%                                   | 91%                      |
|             | RBD | 0.61                                   | 1%                                   | 99%                      |
|             | S1  | 0.36                                   | 1%                                   | 99%                      |
|             | S2  | 0.24                                   | 0%                                   | 100%                     |

16 <sup>†</sup>Index value measurements were calculated by dividing the raw MFI by 3 standard deviation cut-off value  
 17 determined by a panel of 94 pre-pandemic normal human serum specimens.

18 <sup>‡</sup> Positivity is defined as 6 standard deviations above the mean MFI

19

20

## Supplemental Table 4: IgG1-4 Subclass Index Values Stratified by COVID-19 Disease Severity for the Convalescent

21

Cohort (n=481), Related to Figure 3.

|             |                          | Mild  |       |        |        | Moderate    |               |              |             | Severe         |                |                |               |
|-------------|--------------------------|-------|-------|--------|--------|-------------|---------------|--------------|-------------|----------------|----------------|----------------|---------------|
|             |                          | N     | RBD   | S1     | S2     | N           | RBD           | S1           | S2          | N              | RBD            | S1             | S2            |
| <b>IgG1</b> | Mean                     | 16.68 | 14.30 | 103.30 | 10.87  | 20.04       | 20.22         | 147.80       | 19.15       | 23.12          | 29.66          | 239.20         | 31.37         |
|             | SD                       | 11.51 | 13.52 | 114.60 | 30.61  | 12.33       | 17.01         | 138.90       | 49.20       | 10.43          | 19.53          | 190.20         | 71.19         |
|             | SEM                      | 0.78  | 0.92  | 7.78   | 2.08   | 0.84        | 1.16          | 9.47         | 3.36        | 1.49           | 2.79           | 27.18          | 10.17         |
|             | Fold Change <sup>†</sup> |       |       |        |        | <b>1.2*</b> | <b>1.4***</b> | <b>1.4**</b> | <b>1.8*</b> | <b>1.4***</b>  | <b>2.1****</b> | <b>2.3****</b> | <b>2.9***</b> |
| <b>IgG2</b> | Mean                     | 1.36  | 1.17  | 1.71   | 1.16   | 1.83        | 0.84          | 1.45         | 6.04        | 2.08           | 0.45           | 1.79           | 2.58          |
|             | SD                       | 2.41  | 4.18  | 6.50   | 5.09   | 3.90        | 2.55          | 3.91         | 53.51       | 2.33           | 0.74           | 4.35           | 8.70          |
|             | SEM                      | 0.16  | 0.28  | 0.44   | 0.35   | 0.27        | 0.17          | 0.27         | 3.65        | 0.33           | 0.11           | 0.62           | 1.24          |
|             | Fold Change <sup>†</sup> |       |       |        |        | <b>1.3</b>  | <b>0.7</b>    | <b>0.9</b>   | <b>5.2</b>  | <b>1.5**</b>   | <b>0.4</b>     | <b>1.0</b>     | <b>2.2</b>    |
| <b>IgG3</b> | Mean                     | 3.51  | 2.31  | 3.69   | 44.91  | 4.84        | 3.06          | 5.74         | 39.44       | 7.96           | 15.68          | 20.44          | 47.85         |
|             | SD                       | 5.18  | 5.57  | 5.85   | 223.10 | 6.83        | 6.24          | 8.14         | 63.01       | 11.28          | 53.41          | 56.03          | 49.77         |
|             | SEM                      | 0.35  | 0.38  | 0.40   | 15.14  | 0.47        | 0.43          | 0.56         | 4.30        | 1.61           | 7.63           | 8.01           | 7.11          |
|             | Fold Change <sup>†</sup> |       |       |        |        | <b>1.4*</b> | <b>1.3*</b>   | <b>1.6**</b> | <b>0.9</b>  | <b>2.3****</b> | <b>6.8****</b> | <b>5.5****</b> | <b>1.1**</b>  |
| <b>IgG4</b> | Mean                     | 1.15  | 0.50  | 0.35   | 0.27   | 1.86        | 0.79          | 0.43         | 0.24        | 1.85           | 0.61           | 0.40           | 0.27          |
|             | SD                       | 8.00  | 0.27  | 0.20   | 0.61   | 12.91       | 3.52          | 0.71         | 0.15        | 7.41           | 0.32           | 0.26           | 0.28          |
|             | SEM                      | 0.54  | 0.02  | 0.01   | 0.04   | 0.88        | 0.24          | 0.05         | 0.01        | 1.06           | 0.05           | 0.04           | 0.04          |
|             | Fold Change <sup>†</sup> |       |       |        |        | <b>1.6</b>  | <b>1.6</b>    | <b>1.2</b>   | <b>0.9</b>  | <b>1.6**</b>   | <b>1.2</b>     | <b>1.1</b>     | <b>1.0</b>    |

22

23

†Fold change calculation based on the mean of the "mild" group

24

\*denotes significance where \*p&lt;0.05 \*\*p&lt;0.01 \*\*\*p&lt;0.0001 \*\*\*\*p&lt;0.0001 as determined by Kruskal-Wallis, adjusted for multiple comparisons with Dunn's test.

25

**Supplemental Table 5: Ordered Probit Regression, Related to Figure 4a.**

| UNIVARIATE PROPORTIONAL ODDS PROBIT REGRESSION |                           |                 |        | MODEL PERFORMANCE ON TESTING DATA |                 |
|------------------------------------------------|---------------------------|-----------------|--------|-----------------------------------|-----------------|
| Variable                                       | Coefficient (SE)          | p-value         | AIC    | Accuracy (95% CI)                 | p-value ACC>NIR |
| DPO                                            | 0.00842029 (0.06290226)   | 8.94E-01        | 635.23 | 0.4214 (0.3385, 0.5077)           | 7.77E-01        |
| Age                                            | 0.1792742 (0.06333862)    | <b>4.65E-03</b> | 627.22 | 0.5286 (0.4425, 0.6134)           | <b>3.75E-02</b> |
| Gender (Male)                                  | -0.1172834 (0.13943004)   | 4.00E-01        | 634.54 | 0.4214 (0.3385, 0.5077)           | 7.77E-01        |
| PRNT90                                         | 0.1958114 (0.06226123)    | <b>1.66E-03</b> | 625.25 | 0.45 (0.3659, 0.5363)             | 5.33E-01        |
| PRNT50                                         | 0.1824153 (0.06318260)    | <b>3.89E-03</b> | 626.90 | 0.4643 (0.3797, 0.5505)           | 3.98E-01        |
| IgM N                                          | 0.1192098 (0.06165475)    | 5.32E-02        | 631.52 | 0.5571 (0.4708, 0.641)            | <b>7.02E-03</b> |
| IgM RBD                                        | 0.07171105 (0.06237824)   | 2.50E-01        | 633.93 | 0.4786 (0.3935, 0.5646)           | 2.76E-01        |
| IgM S1                                         | 0.08198261 (0.06196963)   | 1.86E-01        | 633.50 | 0.5 (0.4144, 0.5856)              | 1.35E-01        |
| IgM S2                                         | 0.05418636 (0.06214503)   | 3.83E-01        | 634.49 | 0.4214 (0.3385, 0.5077)           | 7.77E-01        |
| IgA N                                          | 0.2121957 (0.06457068)    | <b>1.02E-03</b> | 624.14 | 0.5 (0.4144, 0.5856)              | 1.35E-01        |
| IgA RBD                                        | 0.1038650 (0.06144069)    | 9.09E-02        | 632.39 | 0.4429 (0.359, 0.5292)            | 6.00E-01        |
| IgA S1                                         | 0.1057137 (0.06116121)    | 8.39E-02        | 632.27 | 0.4286 (0.3453, 0.5149)           | 7.23E-01        |
| IgA S2                                         | -0.006981466 (0.06471904) | 9.14E-01        | 635.23 | 0.45 (0.3659, 0.5363)             | 5.33E-01        |
| IgG N                                          | 0.2282152 (0.06524374)    | <b>4.69E-04</b> | 622.79 | 0.5286 (0.4425, 0.6134)           | <b>3.75E-02</b> |
| IgG RBD                                        | 0.3024209 (0.06405524)    | <b>2.34E-06</b> | 612.70 | 0.5214 (0.4354, 0.6065)           | 5.36E-02        |
| IgG S1                                         | 0.3205334 (0.06427497)    | <b>6.14E-07</b> | 610.04 | 0.5214 (0.4354, 0.6065)           | 5.36E-02        |
| IgG S2                                         | 0.1731082 (0.06260303)    | <b>5.69E-03</b> | 627.59 | 0.5643 (0.478, 0.6478)            | <b>4.32E-03</b> |
| IgG1 N                                         | 0.1873592 (0.06359648)    | <b>3.22E-03</b> | 626.54 | 0.55 (0.4637, 0.6341)             | <b>1.11E-02</b> |
| IgG1 RBD                                       | 0.3164681 (0.06377248)    | <b>6.96E-07</b> | 610.31 | 0.5357 (0.4495, 0.6203)           | <b>2.56E-02</b> |
| IgG1 S1                                        | 0.3069176 (0.06392332)    | <b>1.58E-06</b> | 611.87 | 0.5071 (0.4214, 0.5926)           | 1.02E-01        |
| IgG1 S2                                        | 0.1230611 (0.06162206)    | <b>4.58E-02</b> | 631.28 | 0.5071 (0.4214, 0.5926)           | 1.02E-01        |
| IgG2 N                                         | 0.09762629 (0.06173738)   | 1.14E-01        | 632.76 | 0.4714 (0.3866, 0.5575)           | 3.35E-01        |
| IgG2 RBD                                       | -0.07505903 (0.07014432)  | 2.85E-01        | 634.03 | 0.4786 (0.3935, 0.5646)           | 2.76E-01        |
| IgG2 S1                                        | -0.0594108 (0.07129139)   | 4.05E-01        | 634.50 | 0.45 (0.3659, 0.5363)             | 5.33E-01        |
| IgG2 S2                                        | 0.0397431 (0.05994935)    | 5.07E-01        | 634.81 | 0.4643 (0.3797, 0.5505)           | 3.99E-01        |
| IgG3 N                                         | 0.2194403 (0.06429924)    | <b>6.43E-04</b> | 623.24 | 0.5286 (0.4425, 0.6134)           | <b>3.75E-02</b> |
| IgG3 RBD                                       | 0.2619276 (0.08327653)    | <b>1.66E-03</b> | 622.19 | 0.5071 (0.4214, 0.5926)           | 1.02E-01        |
| IgG3 S1                                        | 0.3560372 (0.07712245)    | <b>3.90E-06</b> | 609.82 | 0.5071 (0.4214, 0.5926)           | 1.02E-01        |
| IgG3 S2                                        | 0.1104608 (0.06175604)    | 7.37E-02        | 632.07 | 0.4571 (0.3728, 0.5434)           | 4.65E-01        |
| IgG4 N                                         | 0.007072853 (0.06156942)  | 9.09E-01        | 635.23 | 0.45 (0.3659, 0.5363)             | 5.33E-01        |
| IgG4 RBD                                       | 0.03380058 (0.05986258)   | 5.72E-01        | 634.93 | 0.45 (0.3659, 0.5363)             | 5.33E-01        |
| IgG4 S1                                        | 0.1080485 (0.06200676)    | 8.14E-02        | 632.20 | 0.5 (0.4144, 0.5856)              | 1.35E-01        |
| IgG4 S2                                        | -0.03506842 (0.07450493)  | 6.38E-01        | 635.01 | 0.4429 (0.359, 0.5292)            | 6.00E-01        |
| All variables                                  |                           |                 | 648.02 | 0.5071 (0.4214, 0.5926)           | 1.02E-01        |
| Selected variables                             |                           |                 | 600.80 | 0.6 (0.5139, 0.6818)              | <b>2.56E-04</b> |

Supplemental Table 6: Ordered Probit Regression, Related to Figure 4a.

| PROPORTIONAL ODDS PROBIT REGRESSION WITH AGE AS A COVARIATE |                           |                 |        | MODEL PERFORMANCE ON TESTING DATA |                 |
|-------------------------------------------------------------|---------------------------|-----------------|--------|-----------------------------------|-----------------|
| Variable                                                    | Coefficient (SE)          | p-value         | AIC    | Accuracy (95% CI)                 | p-value ACC>NIR |
| DPO                                                         | -0.004119273 (0.06338651) | 9.48E-01        | 629.22 | 0.5286 (0.4425, 0.6134)           | <b>3.75E-02</b> |
| Gender (Male)                                               | -0.1293131 (0.13987964)   | 3.55E-01        | 628.36 | 0.5429 (0.4566, 0.6272)           | <b>1.71E-02</b> |
| PRNT90                                                      | 0.1559160 (0.06547446)    | <b>1.73E-02</b> | 623.51 | 0.5429 (0.4566, 0.6272)           | <b>1.71E-02</b> |
| PRNT50                                                      | 0.1449436 (0.06572414)    | <b>2.74E-02</b> | 624.36 | 0.5214 (0.4354, 0.6065)           | 5.36E-02        |
| IgM N                                                       | 0.07836274 (0.06409214)   | 2.21E-01        | 627.73 | 0.5214 (0.4354, 0.6065)           | 5.36E-02        |
| IgM RBD                                                     | 0.01943351 (0.06557456)   | 7.67E-01        | 629.13 | 0.55 (0.4637, 0.6341)             | <b>1.11E-02</b> |
| IgM S1                                                      | 0.02322937 (0.06622030)   | 7.26E-01        | 629.10 | 0.5571 (0.4708, 0.641)            | <b>7.02E-03</b> |
| IgM S2                                                      | 0.05514419 (0.06216877)   | 3.75E-01        | 628.44 | 0.5643 (0.478, 0.6478)            | <b>4.32E-03</b> |
| IgA N                                                       | 0.1710039 (0.06742154)    | <b>1.12E-02</b> | 622.63 | 0.5429 (0.4566, 0.6272)           | <b>1.71E-02</b> |
| IgA RBD                                                     | 0.09119512 (0.06167864)   | 1.39E-01        | 627.04 | 0.5357 (0.4495, 0.6203)           | <b>2.56E-02</b> |
| IgA S1                                                      | 0.09161639 (0.06145615)   | 1.36E-01        | 627.01 | 0.5143 (0.4284, 0.5996)           | 7.47E-02        |
| IgA S2                                                      | -0.0227294 (0.06522780)   | 7.27E-01        | 629.10 | 0.5214 (0.4354, 0.6065)           | 5.36E-02        |
| IgG N                                                       | 0.1942685 (0.06750208)    | <b>4.00E-03</b> | 620.84 | 0.5571 (0.4708, 0.641)            | <b>7.02E-03</b> |
| IgG RBD                                                     | 0.2820277 (0.06481207)    | <b>1.35E-05</b> | 610.10 | 0.5929 (0.5067, 0.675)            | <b>4.76E-04</b> |
| IgG S1                                                      | 0.2993826 (0.06512311)    | <b>4.28E-06</b> | 607.84 | 0.5357 (0.4495, 0.6203)           | <b>2.56E-02</b> |
| IgG S2                                                      | 0.1487403 (0.06345589)    | <b>1.91E-02</b> | 623.72 | 0.5857 (0.4995, 0.6683)           | <b>8.61E-04</b> |
| IgG1 N                                                      | 0.1443364 (0.06732723)    | <b>3.20E-02</b> | 624.62 | 0.5929 (0.5067, 0.675)            | <b>4.76E-04</b> |
| IgG1 RBD                                                    | 0.2937825 (0.06482250)    | <b>5.84E-06</b> | 608.46 | 0.5786 (0.4923, 0.6615)           | <b>1.52E-03</b> |
| IgG1 S1                                                     | 0.2837305 (0.06491573)    | <b>1.24E-05</b> | 609.88 | 0.5214 (0.4354, 0.6065)           | 5.36E-02        |
| IgG1 S2                                                     | 0.09804867 (0.06240420)   | 1.16E-01        | 626.76 | 0.5571 (0.4708, 0.641)            | <b>7.02E-03</b> |
| IgG2 N                                                      | 0.08248615 (0.06185257)   | 1.82E-01        | 627.45 | 0.5286 (0.4425, 0.6134)           | <b>3.75E-02</b> |
| IgG2 RBD                                                    | -0.06202069 (0.07071954)  | 3.80E-01        | 628.41 | 0.5357 (0.4495, 0.6203)           | <b>2.57E-02</b> |
| IgG2 S1                                                     | -0.05381328 (0.07181056)  | 4.54E-01        | 628.62 | 0.5357 (0.4495, 0.6203)           | <b>2.57E-02</b> |
| IgG2 S2                                                     | 0.03299862 (0.06017975)   | 5.83E-01        | 628.92 | 0.5357 (0.4495, 0.6203)           | <b>2.57E-02</b> |
| IgG3 N                                                      | 0.1925910 (0.06495653)    | <b>3.03E-03</b> | 620.21 | 0.5714 (0.4851, 0.6547)           | <b>2.59E-03</b> |
| IgG3 RBD                                                    | 0.2625168 (0.08549222)    | <b>2.14E-03</b> | 616.70 | 0.5 (0.4144, 0.5856)              | 1.35E-01        |
| IgG3 S1                                                     | 0.3463172 (0.07767068)    | <b>8.24E-06</b> | 605.61 | 0.5429 (0.4566, 0.6272)           | <b>1.71E-02</b> |
| IgG3 S2                                                     | 0.1169920 (0.06213372)    | 5.97E-02        | 625.71 | 0.5 (0.4144, 0.5856)              | 1.35E-01        |
| IgG4 N                                                      | -0.008487359 (0.06277202) | 8.92E-01        | 629.20 | 0.5286 (0.4425, 0.6134)           | <b>3.75E-02</b> |
| IgG4 RBD                                                    | 0.04314625 (0.06013673)   | 4.73E-01        | 628.70 | 0.5286 (0.4425, 0.6134)           | <b>3.75E-02</b> |
| IgG4 S1                                                     | 0.1071146 (0.06217504)    | 8.49E-02        | 626.25 | 0.5286 (0.4425, 0.6134)           | <b>3.75E-02</b> |
| IgG4 S2                                                     | -0.02925658 (0.07612034)  | 7.01E-01        | 629.06 | 0.5286 (0.4425, 0.6134)           | <b>3.75E-02</b> |

Supplemental Table 7: IgG Subclass Index Ratios, Related to Figure 4b.

|                   |     | IgG1/IgG |        |       |                          | IgG3/IgG |       |       |                          |
|-------------------|-----|----------|--------|-------|--------------------------|----------|-------|-------|--------------------------|
|                   |     | Mean     | SD     | SEM   | Fold Change <sup>†</sup> | Mean     | SD    | SEM   | Fold Change <sup>†</sup> |
| Mild              | N   | 2.925    | 4.475  | 0.304 |                          | 0.256    | 0.399 | 0.027 |                          |
|                   | RBD | 2.043    | 3.077  | 0.209 |                          | 0.198    | 0.288 | 0.020 |                          |
|                   | S1  | 4.918    | 2.475  | 0.168 |                          | 0.230    | 0.398 | 0.027 |                          |
|                   | S2  | 0.260    | 0.350  | 0.024 |                          | 2.170    | 2.493 | 0.169 |                          |
| Moderate          | N   | 2.770    | 2.845  | 0.194 | <b>0.9</b>               | 0.243    | 0.289 | 0.020 | <b>0.9</b>               |
|                   | RBD | 2.351    | 3.304  | 0.225 | <b>1.2</b>               | 0.203    | 0.346 | 0.024 | <b>1.0</b>               |
|                   | S1  | 5.652    | 2.656  | 0.181 | <b>1.1</b>               | 0.230    | 0.261 | 0.018 | <b>1.0</b>               |
|                   | S2  | 0.364    | 0.470  | 0.032 | <b>1.4</b>               | 1.853    | 1.976 | 0.135 | <b>0.9</b>               |
| Severe            | N   | 2.232    | 0.730  | 0.104 | <b>0.8</b>               | 0.314    | 0.398 | 0.057 | <b>1.3</b>               |
|                   | RBD | 1.504    | 0.523  | 0.075 | <b>0.7</b>               | 0.666    | 1.842 | 0.263 | <b>3.4**</b>             |
|                   | S1  | 6.747    | 2.857  | 0.408 | <b>1.4****</b>           | 0.516    | 1.100 | 0.157 | <b>2.2****</b>           |
|                   | S2  | 0.494    | 0.545  | 0.078 | <b>1.9***</b>            | 1.979    | 1.931 | 0.276 | <b>0.9</b>               |
| Validation Cohort | N   | 2.471    | 1.199  | 0.212 | <b>0.8</b>               | 0.490    | 0.815 | 0.144 | <b>2.0*</b>              |
|                   | RBD | 3.898    | 1.579  | 0.279 | <b>1.9****</b>           | 0.544    | 0.757 | 0.134 | <b>2.7**</b>             |
|                   | S1  | 18.730   | 12.930 | 2.285 | <b>3.8****</b>           | 1.103    | 1.459 | 0.258 | <b>4.8****</b>           |
|                   | S2  | 0.993    | 1.960  | 0.346 | <b>3.8****</b>           | 2.257    | 3.304 | 0.584 | <b>1.0</b>               |

<sup>†</sup> Fold change calculation based on the mean of the "mild" group

\*denotes significance where \*p<0.05 \*\*p<0.01 \*\*\*p<0.0001 \*\*\*\*p<0.0001 as determined by Kruskal-Wallis, adjusted for multiple comparisons with Dunn's test



**Supplemental Table 8: Clinical Characteristics of the Validation Cohort, Related to STAR Methods.**

|                         | <b>All</b> | <b>Male</b> | <b>Female</b> |
|-------------------------|------------|-------------|---------------|
| <b>Count</b>            | <b>32</b>  | 12(37.5%)   | 20(62.5%)     |
| <b>Mean Age (years)</b> | 60         | 59          | 61            |

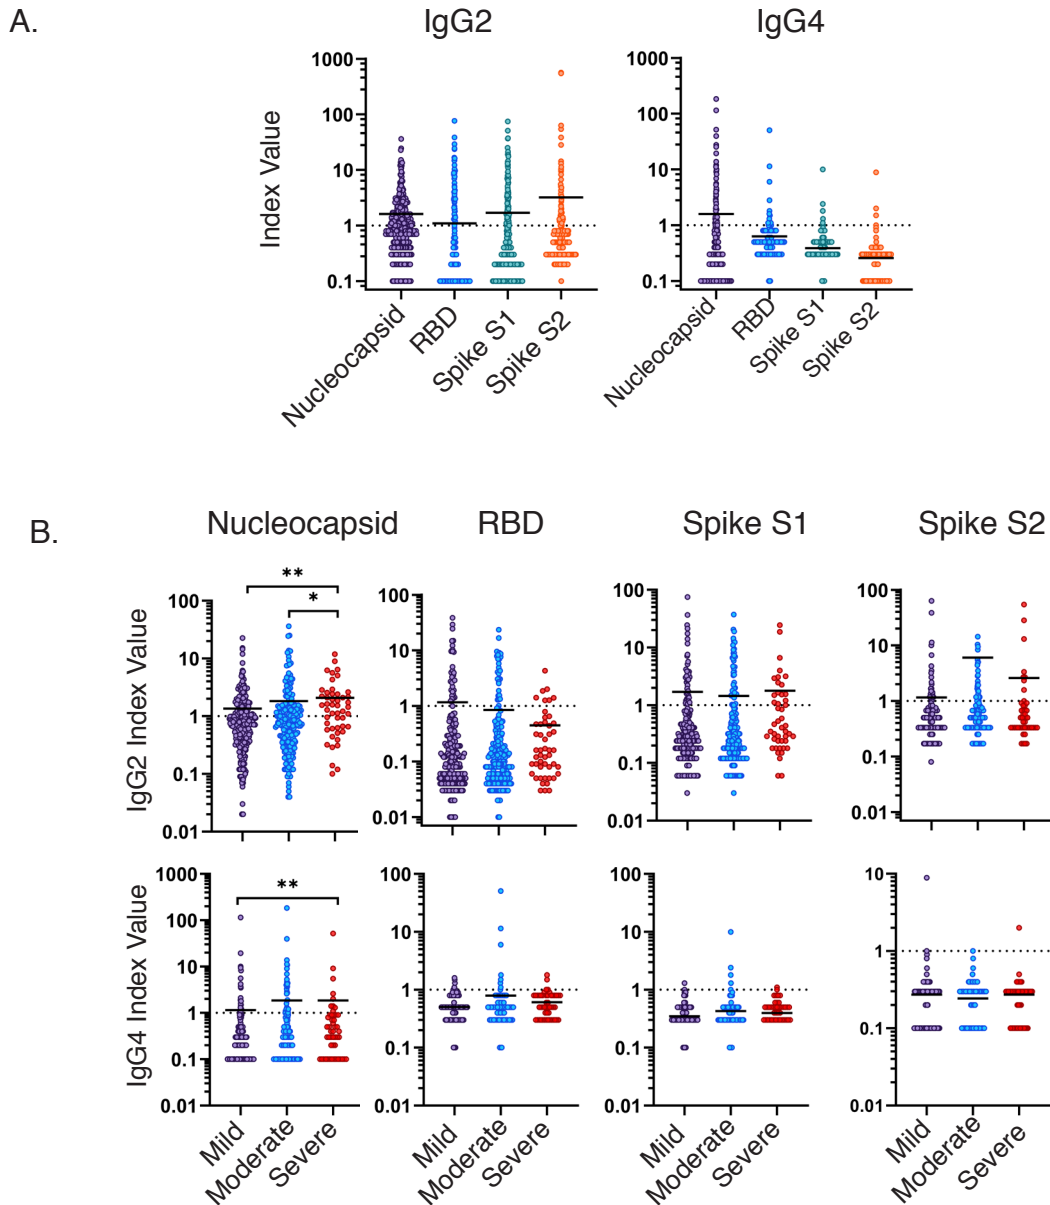

**Supplemental Figure 1: IgG Subclass and Antigen Distribution of the SARS-CoV-2 specific Antibody Profile Across COVID-19 Disease Severities, Related to Figure 3.**

Serum specimens from convalescent COVID-19 donors were analyzed for reactivity of IgG2, and IgG4 specific to the SARS-CoV-2 nucleocapsid, RBD, S1 subunit, or S2 subunit. Index values represent the raw MFI divided by the cutoff value (3 standard deviations above the mean) determined by a panel of 94 pre-pandemic normal human serum specimens (cutoff = dashed line). (a) Reactivity of IgG1, IgG2, and IgG3 to SARS-CoV-2 nucleocapsid, RBD, S1 subunit, or S2 subunit of the full patient cohort (b) or grouped by disease severity. Index value represents the raw MFI divided by the background cutoff value determined by a panel of 93 normal human serum specimens. Statistical significance was determined by the non-parametric Kruskal-Wallis test where \* $p < 0.05$  \*\* $p < 0.001$  \*\*\* $p < 0.0001$ , and \*\*\*\* $p < 0.00001$  adjusted for multiple comparisons by Dunn's test.

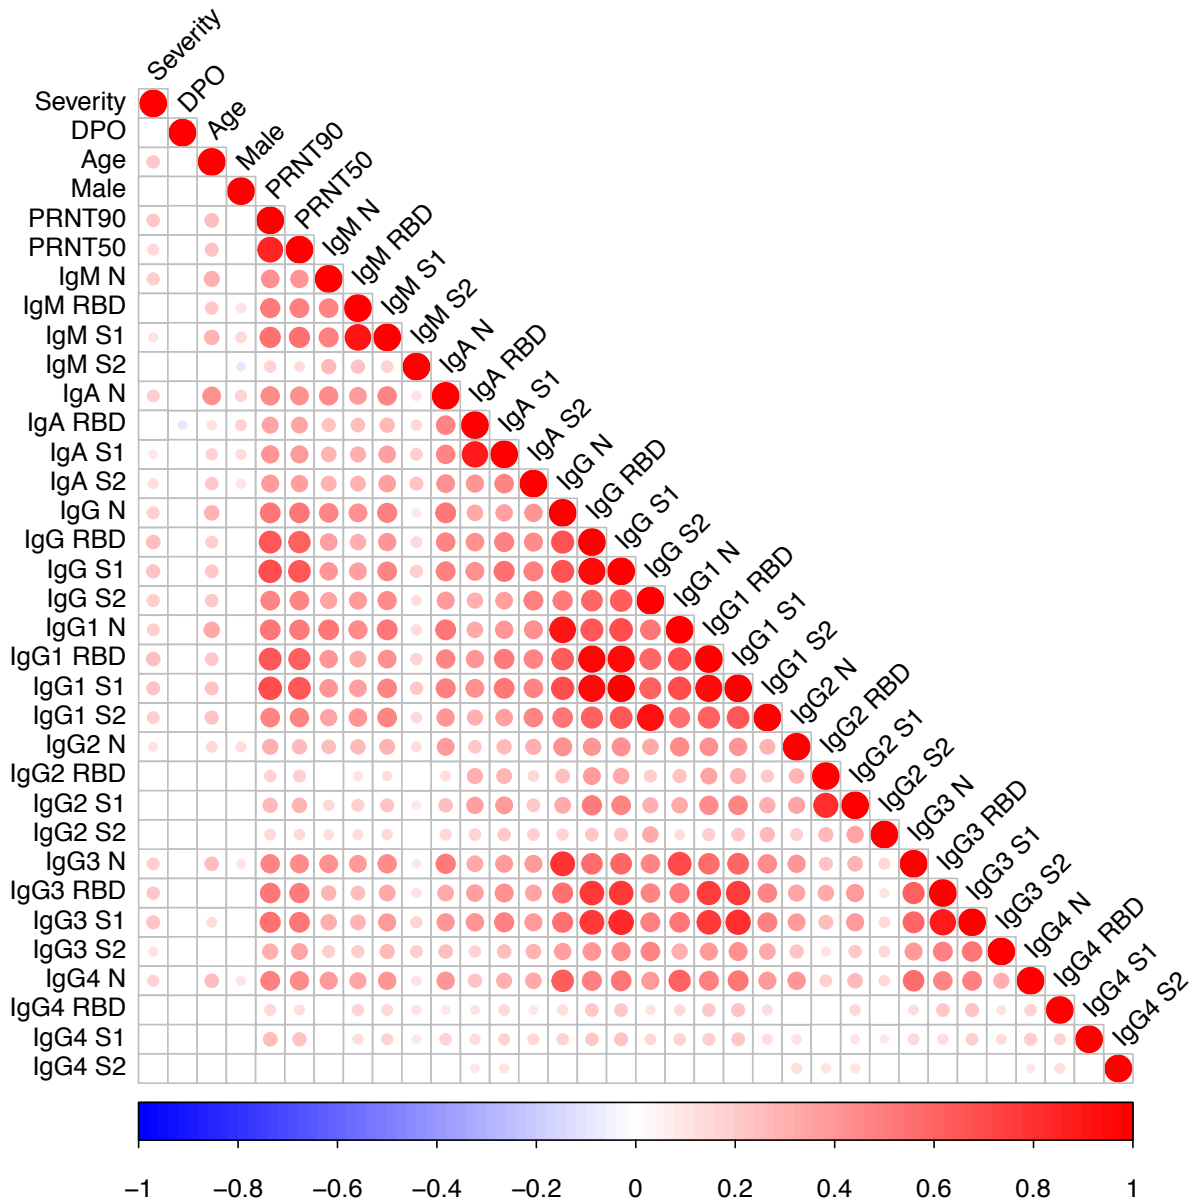

**Supplemental Figure 2: Correlation Matrix of Antibody Measurements and Clinical Features, Related to Figure 5.** Correlation matrix of antibody reactivities, neutralization titers, patient features, and COVID-19 disease severity. Circles representing Spearman's correlations are displayed, with color and size of the circle reflecting the strength of the correlation. Only correlations with  $p < 0.05$  are represented by a circle. All p-values are adjusted via the Benjamini and Hochberg method.

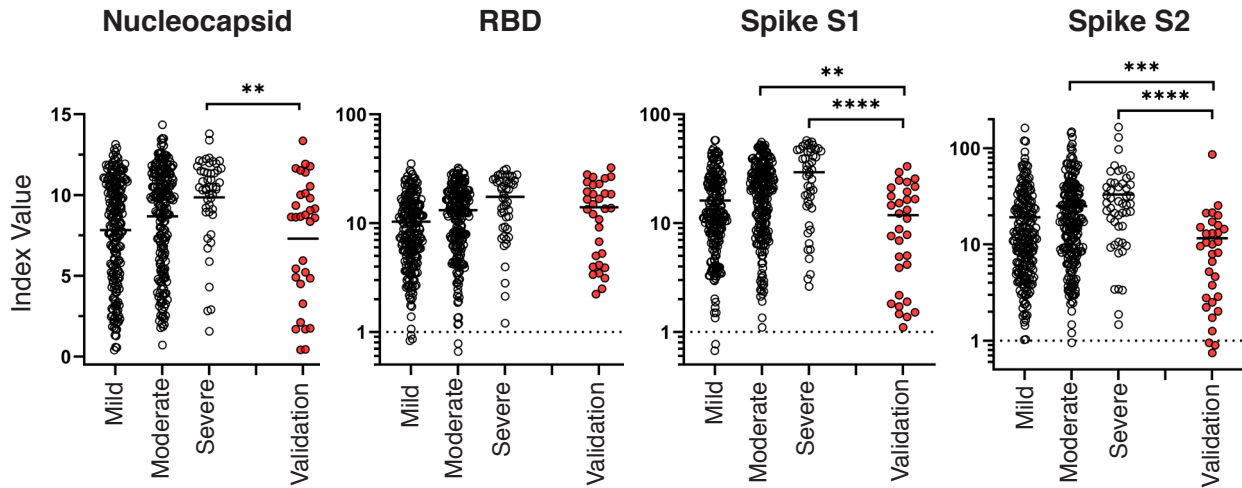

**Supplemental Figure 3: SARS-CoV-2 specific IgG of the Validation Cohort compared to the Convalescent Cohort Across COVID-19 Disease Severities, Related to Figures 3, 4, and 6.**

IgG reactivity to SARS-CoV-2 nucleocapsid, RBD, S1, or S2 of the convalescent cohort (n=481) grouped by disease severity, and compared to the validation cohort (n=32). Index values represent the raw MFI divided by the background cutoff value determined by a panel of 94 normal human serum specimens. Statistical significance was determined by the non-parametric Kruskal-Wallis test where \*p < 0.05 \*\*p < 0.001 \*\*\*p < 0.0001, and \*\*\*\*p < 0.00001 adjusted for multiple comparisons by Dunn's test.
